# Supplementary material for: Preoperative Venous Thromboembolism in Orthopedic Oncology Patients: Incidence, Risk Factors, and D-Dimer Cutoff Value
Source: Research Square preprint supplement (doi:10.21203/rs.3.rs-863648/v1), 2021-09-20
Supplement: Supplementary file 1 [file 32a9ef4c79041cac98e98477.xlsx]

## Sheet: Sheet1
	Variables		VTEa (-)	VTE (+)	Univariate analysis	Multivariate analysis
					p-value	ORb (95% CI)	p-value
	Number of patients (n = 199)		180 (90.5%)	19 (9.5%)
	Sex	Male	103	10
		Female	77	9	0.85
	Age (years)		59.7 ± 1.4	70.8 ± 3.7	0.0039	1.05 (1.01-1.09)	0.012
		< 60	74	2
		≥ 60	106	17	0.011	5.91 (1.32-26.5)	0.021
	Body mass index (cm/kg)		22.5 ± 0.29	21.4 ± 0.94	0.24
	Size (mm)		80.4 ± 4.8	65.8 ± 6.5	0.79
	Location	Lower limb	116	17
		Other	64	2	0.038	4.53 (1.01-20.4)	0.048
	Origin	Bone	80	10
		Soft tissue	100	9	0.63
		Superficial	36	4
		Deep	144	15	0.77
	D-dimer (μg/mL)		0.65 ± 0.48	2.64 ± 0.64	< 0.001	1.01 (0.964-1.08)	0.51
	Performance Status	0-2	154	16
		3, 4	26	3	0.74
	Pathological fracture		23	3	0.71
	Hematologic status	Hemoglobin (g/dL)	12.9 ± 0.15	13.0 ± 0.45	0.88
		White blood cell (/μL)	7010 ± 390	6080 ± 290	0.38
		Platelet (×104/μL)	28.0 ± 1.5	26.2 ± 2.1	0.99
		C related protein (mg/L)	1.78 ± 0.33	0.56 ± 0.17	0.8
