# Supplementary material for: Preoperative Venous Thromboembolism in Orthopedic Oncology Patients: Incidence, Risk Factors, and D-Dimer Cutoff Value
Source: Research Square preprint supplement (doi:10.21203/rs.3.rs-863648/v1), 2021-09-20
Supplement: Supplementary file 2 [file 4ce8b802f0147be73bd8c044.xlsx]

## Sheet: Sheet1
	Age	Sex	BMIa	Location	Depth	Diagnosis	Pathological	PSb	D-Dimer	Location
			(cm/kg)				fracture		(μg/mL)	of VTEc
1	76	Male	22.3	Thigh	Superficial	Myxofibrosarcoma	-	0	1.05	Distal
2	66	Male	18.7	Femur	Bone	Lung cancer	-	2	5.69	Distal
3	66	Male	29.1	Thigh	Superficial	UPSd	-	0	1.58	Distal
4	86	Female	22.2	Thigh	Deep	Leiomyosarcoma	-	1	3.69	Proximal
5	79	Male	29.2	Lower leg	Superficial	UPS	-	1	2.16	Distal
6	77	Female	17	Patella	Bone	Malignant lymphoma	-	2	2.33	PEe, distal
7	58	Male	19.8	Femur	Bone	Lung cancer	+	3	11.72	PE, distal
8	73	Female	16.4	Femur	Bone	UPS	+	4	2.43	Distal
9	64	Female	18	Tibia	Bone	Uterine cancer	-	1	4.65	Distal
10	91	Male	20.4	Forearm	Superficial	Myxofibrosarcoma	-	1	2.32	Distal
11	78	Female	20.2	Pelvis	Bone	UPS	-	1	4.23	Proximal
12	67	Female	17.9	Buttocks	Deep	UPS	-	1	2.71	Distal
13	76	Female	25	Lower leg	Deep	Leiomyosarcoma	-	1	1.21	Distal
14	19	Male	22.2	Tibia	Bone	Osteosarcoma	-	1	1.53	Distal
15	91	Female	20.4	Elbow	Deep	Myxofibrosarcoma	-	1	2.49	Distal
16	60	Female	23.2	Femur	Bone	Breast cancer	+	4	9.28	Distal
17	75	Male	24.5	Pelvis	Bone	Malignant lymphoma	-	1	1.76	Distal
18	85	Male	15.4	Sacrum	Bone	Lung cancer	-	1	2.85	Distal
19	79	Male	24.8	Lower leg	Deep	Myxofibrosarcoma	-	1	1.91	Proximal
