# Supplementary material for: Preoperative Venous Thromboembolism in Orthopedic Oncology Patients: Incidence, Risk Factors, and D-Dimer Cutoff Value
Source: Research Square preprint supplement (doi:10.21203/rs.3.rs-863648/v1), 2021-09-20
Supplement: Supplementary file 3 [file 94403e8957d7a9def3197ad0.xlsx]

## Sheet: Sheet1
	Diagnosis	Total VTEa	VTE (-)	VTE (+)	Proportion (%)
	Soft tissue sarcoma	103	94	9	8.7
	Bone sarcoma	38	35	3	7.9
	Metastasis	46	41	5	10.9
	Hematologic malignancy	12	10	2	16.7
	Total	199	180	19	9.5
