# Supplementary material for: Preoperative Venous Thromboembolism in Orthopedic Oncology Patients: Incidence, Risk Factors, and D-Dimer Cutoff Value
Source: Research Square preprint supplement (doi:10.21203/rs.3.rs-863648/v1), 2021-09-20
Supplement: Supplementary file 4 [file ab980ce604e223ea3063a0dd.xlsx]

## Sheet: Sheet1
Primary	Myxofibrosarcoma	27	Metastasis		Renal cell cancer	16
soft tissue sarcoma	UPSa	24			Lung cancer	11
	Myxoid liposarcoma	10			Prostatic cancer	5
	MPNSTb	8			Breast cancer	3
	Synovial sarcoma	7			Esophageal cancer	2
	Dedifferentiated liposarcoma	6			Colorectal cancer	2
	Leiomyosarcoma	7			Bladder cancer	2
	Extraskeletal myxoid chondrosarcoma	5			Thyroid cancer	1
	Dermatofibrosarcoma protuberans	3			Gastric cancer	1
	Pleomorphic liposarcoma	2			Liver cancer	1
	Rhabdomyosarcoma	2			Pancreatic cancer	1
	Others	2			Uterine cancer	1
	Subtotal	103			Subtotal	46
Primary	Chondrosarcoma	15	Hematologic malignancy		Lymphoma	9
bone sarcoma	Osteosarcoma	13			Multiple myeloma	3
	UPS	5
	Ewing sarcoma	2
	Chordoma	2
	Malignant giant cell tumor of bone	1
	Subtotal	38			Subtotal	12
Total						199
